# Supplementary material
Source: bioRxiv or medRxiv preprint supplement (https://www.medrxiv.org/highwire/filestream/69133/field_highwire_adjunct_files/0/19004283-1.pdf)
Supplement: Supplementary file [file 19004283-1.pdf]

## **SUPPORTING INFORMATION**

### Appendix I

#### PubMed Search Strategy

("zika virus"[MeSH Terms] OR ("zika"[All Fields] AND "virus"[All Fields]) OR "zika virus"[All Fields]) AND ("microcephaly"[MeSH Terms] OR "microcephaly"[All Fields]) AND ("infant, newborn"[MeSH Terms] OR ("infant"[All Fields] AND "newborn"[All Fields]) OR "newborn infant"[All Fields] OR "newborn"[All Fields]) OR ("pregnancy"[MeSH Terms] OR "pregnancy"[All Fields]) AND ("neuroimage"[MeSH Terms] OR "neuroimage"[All Fields])
